# Supplementary material for: Activated Biomass-derived Graphene-based Carbons for Supercapacitors with High Energy and Power Density
Source: PubMed Central journal article supplement (PMC5789836; doi:10.1038/s41598-018-20096-8), 2018-01-30
Supplement: 41598_2018_20096_MOESM1_ESM.pdf [file 41598_2018_20096_MOESM1_ESM.pdf]

# Activated Biomass-derived Graphene-based Carbons for Supercapacitors with High Energy and Power Density

*SungHoon Jung,<sup>1</sup> Yusik Myung,<sup>1</sup> Bit Na Kim,<sup>2</sup> In Gyoo Kim,<sup>2</sup> In-Kyu You,<sup>2</sup> TaeYoung Kim<sup>1\*</sup>*

<sup>1</sup>Department of Bionanotechnology, Gachon University, Seongnamdaero 1342, Seongnam 13120, Korea

<sup>2</sup>Electronics and Telecommunications Research Institute, Daejeon 34129, Korea

\* Corresponding Author. E-mail address: [taeykim@gachon.ac.kr](mailto:taeykim@gachon.ac.kr) (TaeYoung Kim)

**Table S1.** Atomic percent and atomic ratio of BGC, a-BGC-1 and a-BGC-2.

|         | Atomic Percent (%) |      |      | Atomic Ratio<br>(C/O) |
|---------|--------------------|------|------|-----------------------|
|         | C                  | O    | N    |                       |
| BCG     | 92.78              | 3.62 | 3.60 | 25.60                 |
| a-BGC-1 | 94.49              | 3.16 | 2.35 | 29.90                 |
| a-BGC-2 | 97.80              | 2.20 | -    | 44.50                 |

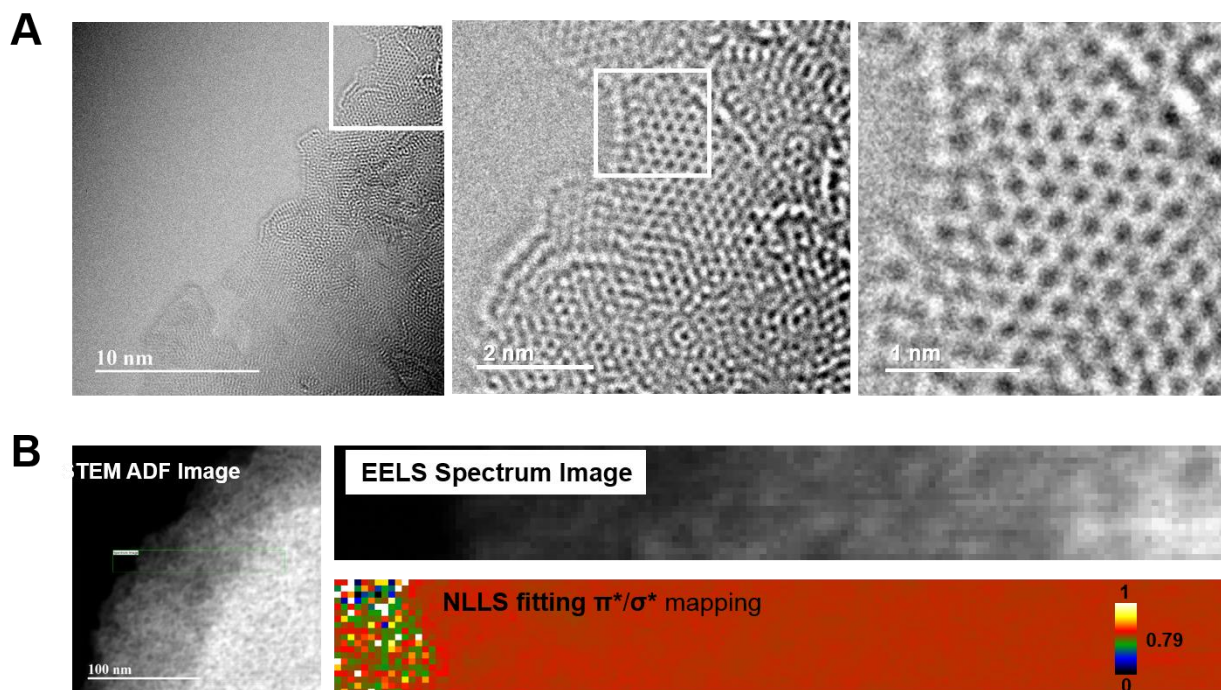

**Figure S1.** (A) High-resolution of TEM image of a-BGC-1 (scale bar: 10, 2 and 1 nm). (B) NLLS fitting of a-BGC-1.

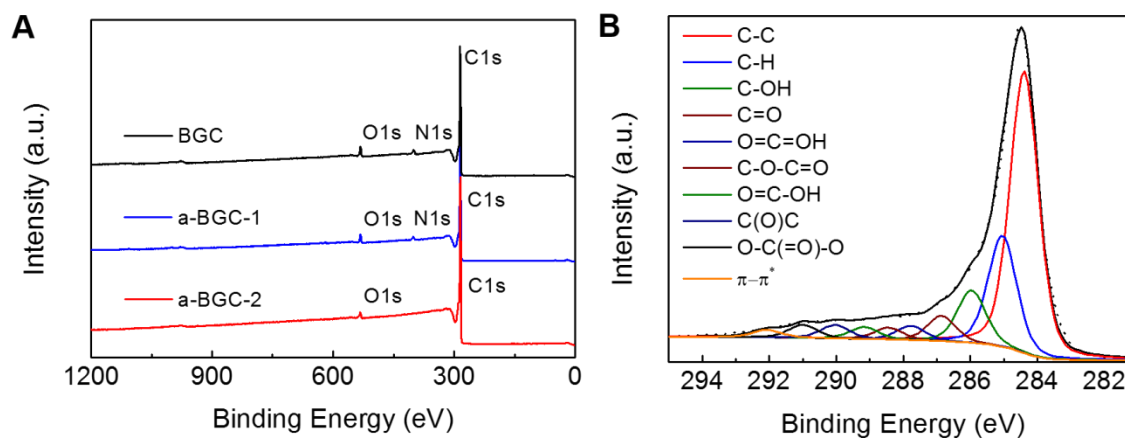

**Figure S2.** XPS spectrum for BGC and a-BGC. (A) Survey scan of BGC, a-BGC-1 and a-BGC-2. (B) C1s XPS spectrum of a-BGC-1.

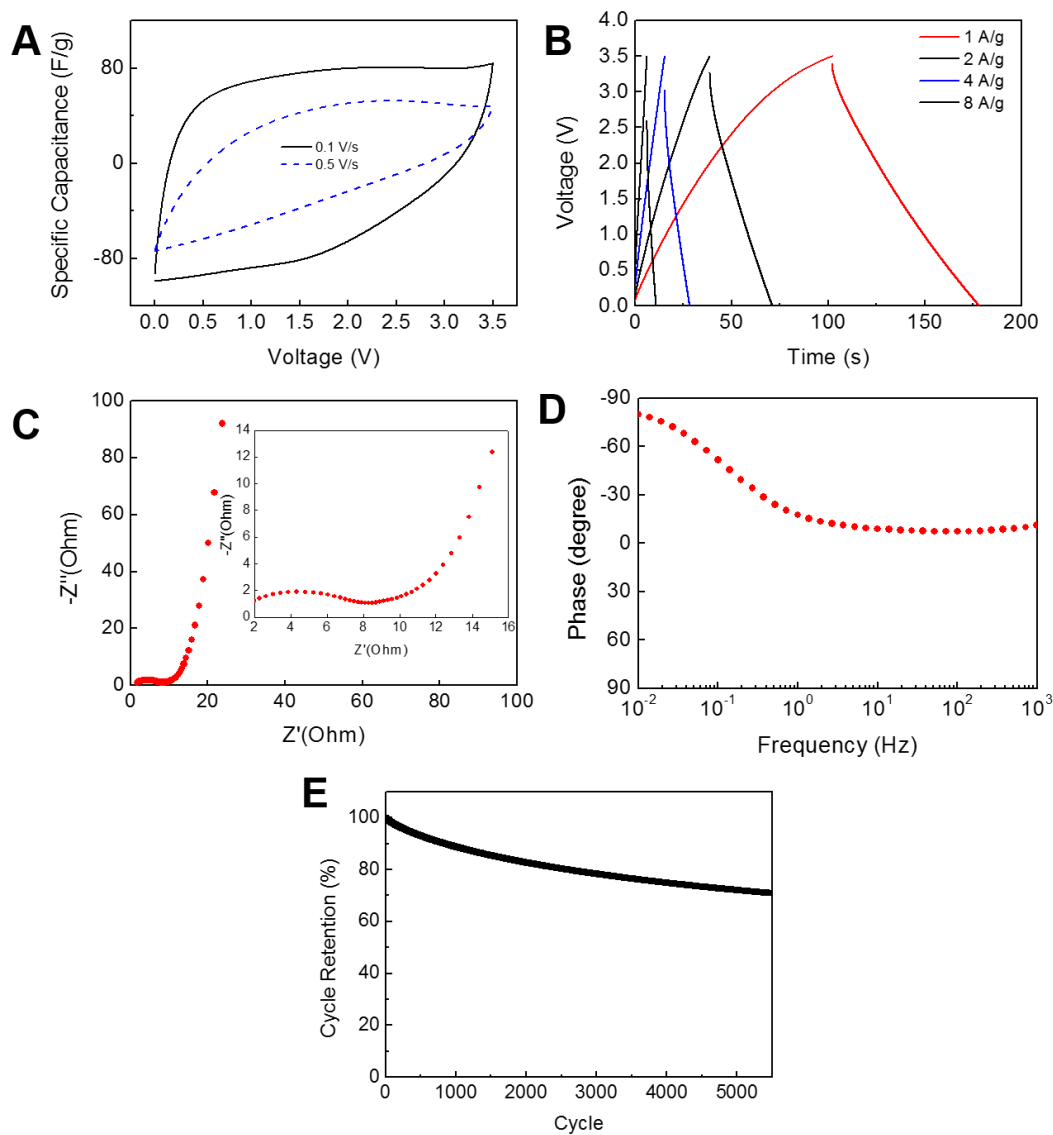

**Figure S3.** Electrochemical test of BGC electrode with EMIM-TFSI/AN electrolyte. (A) Cyclic voltammograms profiles at different scan rates (B) Galvanostatic charge-discharge curves for different current densities (C) Nyquist plot (D) Impedance phase angle versus frequency (E) Cyclic test over 5,000 cycles.

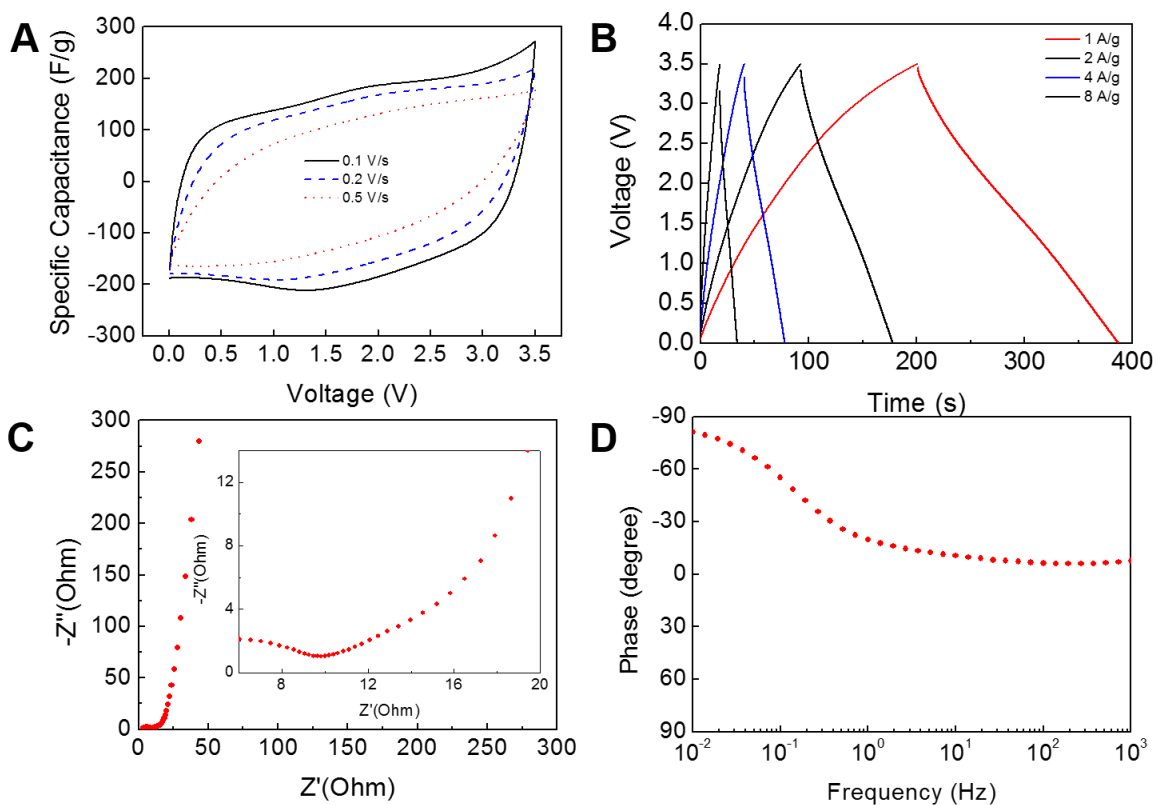

**Figure S4.** Electrochemical test of a-BGC-2 electrode with neat EMIM-TFSI. (A) Cyclic voltammetry profiles at different scan rates (B) Galvanostatic charge-discharge curves for different current densities (C) Nyquist plot (D) Impedance phase angle versus frequency

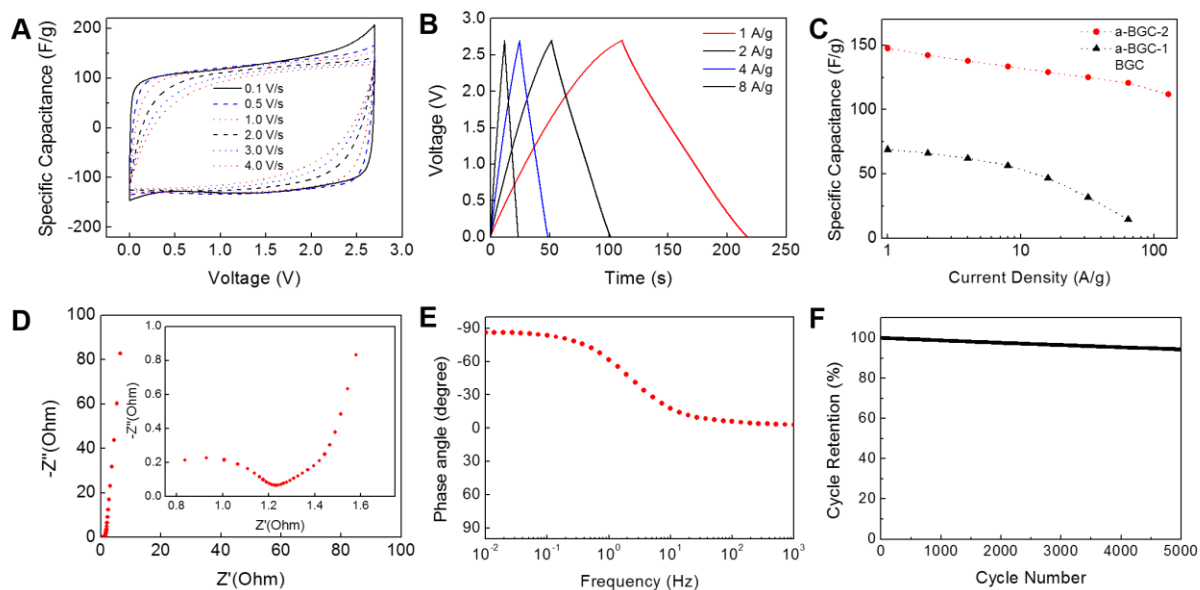

**Figure S5.** Electrochemical test of a-BGC-2 in 1 M TEABF<sub>4</sub>/AN. (A) Cyclic voltammetry profiles at different scan rates. (B) Galvanostatic charge-discharge curves for different current densities. (C) Specific capacitance at different current densities (D) Nyquist plot (E) Impedance phase angle versus frequency (F) Cyclic test over 5,000 cycles.

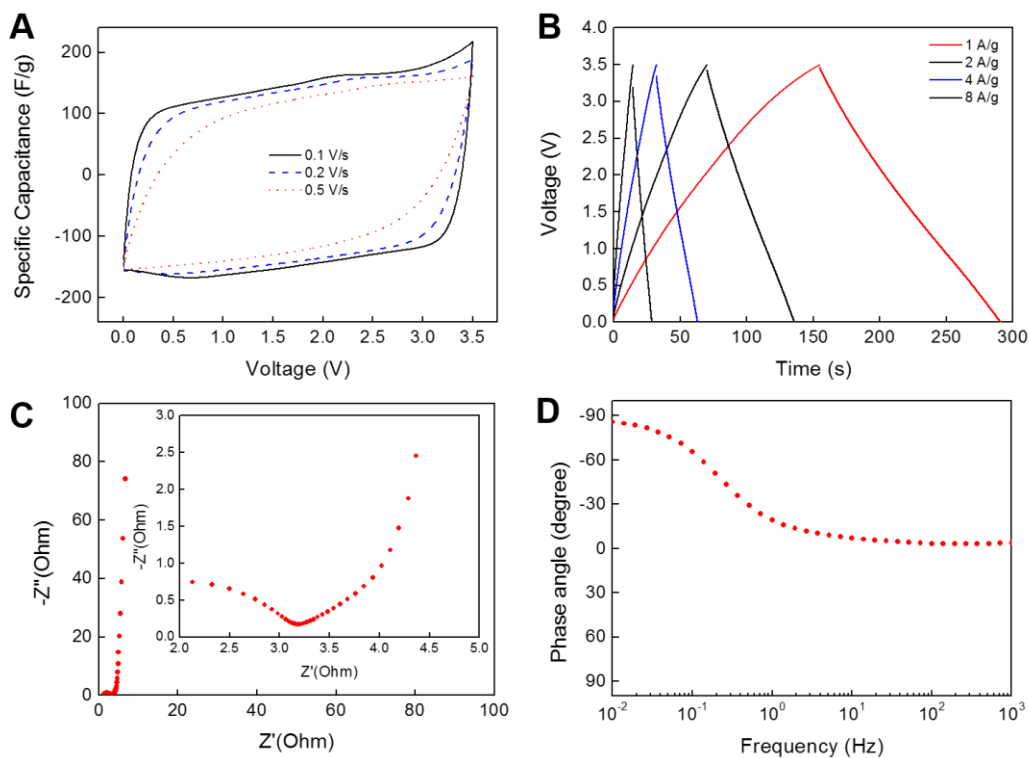

**Figure S6.** Electrochemical test of high mass loaded electrode (~180 μm of thickness). (A) Cyclic voltammetry profiles at different scan rates (B) Galvanostatic charge-discharge curves for different current densities (C) Nyquist plot (D) Impedance phase angle versus frequency

**Table S2.** Comparison of the performance of a-BGC with biomass-derived carbons reported in the literature.

| Carbon Material                           | Specific Capacitance (F g <sup>-1</sup> )                  | Electrolyte                     | Ref       |
|-------------------------------------------|------------------------------------------------------------|---------------------------------|-----------|
| a-BGC                                     | 175 (1 A g <sup>-1</sup> ), 100 (128 A g <sup>-1</sup> )   | EMIM-TFSI / AN                  | This Work |
|                                           | 147 (1 A g <sup>-1</sup> ), 111 (128 A g <sup>-1</sup> )   | 1 M TEABF <sub>4</sub> / AN     |           |
|                                           | 221 (1 A g <sup>-1</sup> )                                 | EMIM-TFSI                       |           |
| Vinasse-derived carbon                    | 163 (1 A g <sup>-1</sup> ), 141 (20 A g <sup>-1</sup> )    | 1 M TEABF <sub>4</sub> / AN     | 1         |
| Paper pulp-derived carbon                 | 162 (0.1 A g <sup>-1</sup> ), 120 (10 A g <sup>-1</sup> )  | TEABF <sub>4</sub> / AN         | 2         |
|                                           | 162 (0.1 A g <sup>-1</sup> ), 95.3 (10 A g <sup>-1</sup> ) | EMIM-TFSI                       |           |
| Nanocarbon-enhanced activated carbon film | 88 (0.1 A g <sup>-1</sup> )                                | BMPY-TFSI                       | 3         |
| Graphene hybrid activated carbon          | 196 (1 A g <sup>-1</sup> )                                 | EMIM-BF <sub>4</sub>            | 4         |
| Dead leaved-derived carbon                | 88 (2 A g <sup>-1</sup> )                                  | 1 M LiPF <sub>6</sub> in EC-DEC | 5         |

## References

- Shi, C.; Hu, L.; Guo, K.; Li, H.; Zhai, T., Highly Porous Carbon with Graphene Nanoplatelet Microstructure Derived from Biomass Waste for High-Performance Supercapacitors in Universal Electrolyte. *Advanced Sustainable Systems* **2017**, *1* (1-2).
- Wang, H.; Li, Z.; Tak, J. K.; Holt, C. M.; Tan, X.; Xu, Z.; Amirkhiz, B. S.; Harfield, D.; Anyia, A.; Stephenson, T., Supercapacitors based on carbons with tuned porosity derived from paper pulp mill sludge biowaste. *Carbon* **2013**, *57*, 317-328.

3. Li, Z.; Liu, J.; Jiang, K.; Thundat, T., Carbonized nanocellulose sustainably boosts the performance of activated carbon in ionic liquid supercapacitors. *Nano Energy* **2016**, *25*, 161-169.
4. Huang, J.; Wang, J.; Wang, C.; Zhang, H.; Lu, C.; Wang, J., Hierarchical porous graphene carbon-based supercapacitors. *Chemistry of Materials* **2015**, *27* (6), 2107-2113.
5. Biswal, M.; Banerjee, A.; Deo, M.; Ogale, S., From dead leaves to high energy density supercapacitors. *Energy & Environmental Science* **2013**, *6* (4), 1249-1259.
